# Supplementary material for: Synthesis and characterization of amorphous precipitated silica from alkaline dissolution of olivine
Source: Royal Society of Chemistry journal article supplement (doi:10.1039/c8ra06257a), 2018-01-01
Supplement: c8ra06257a1.pdf [file c8ra06257a1.pdf]

**Supplementary Material**

**Synthesis and characterization of amorphous precipitated silica from alkaline  
dissolution of olivine**

**Nadeem Raza,<sup>[a,b]</sup> Waseem Raza,<sup>[c]</sup> Silvia Madeddu,<sup>[a]</sup> Henry Agbe,<sup>[a]</sup> R.V. Kumar,<sup>[a]</sup>**

**Ki-Hyun Kim<sup>\*,[d]</sup>**

<sup>[a]</sup>*Department of Material Science & Metallurgy, University of Cambridge United  
Kingdom;* <sup>[b]</sup>*Govt. Emerson College, affiliated with Bahauddin Zakariya University, Multan;*  
<sup>[c]</sup>*State Key Laboratory of Fine Chemicals, School of Chemical Engineering, Dalian  
university of Technology, Dalian, Liaoning, 116024 China;* <sup>\*,[d]</sup>*Department of Civil and  
Environmental Engineering, Hanyang University, Seoul 04763, Korea*

14

15

**Table S1.**Chemical analysis of olivine

| Serial # | Component                      | [Wt.%] |
|----------|--------------------------------|--------|
| 1        | MgO                            | 40.0   |
| 2        | Fe <sub>2</sub> O <sub>3</sub> | 9.5    |
| 3        | Al <sub>2</sub> O <sub>3</sub> | 0.7    |
| 4        | CaO                            | 0.4    |
| 5        | SiO <sub>2</sub>               | 39.0   |
| 6        | Loss on ignition               | 11.4 % |

16

17

18

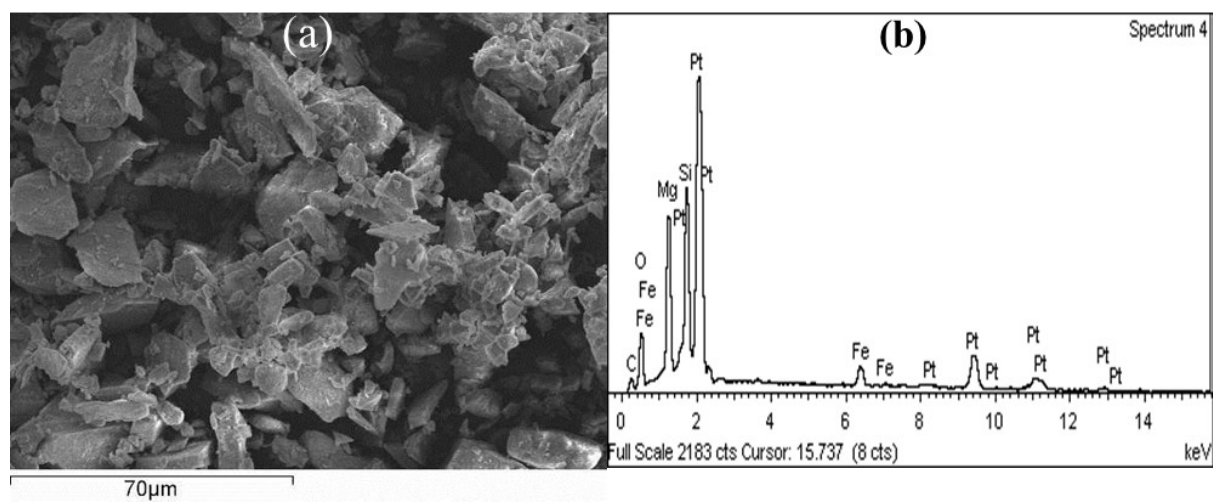

20

21 **Fig. S1** Morphological characteristics of ground olivine(a)SEM image (b) EDX spectrum

22

## Schematic of APS synthesis from olivine

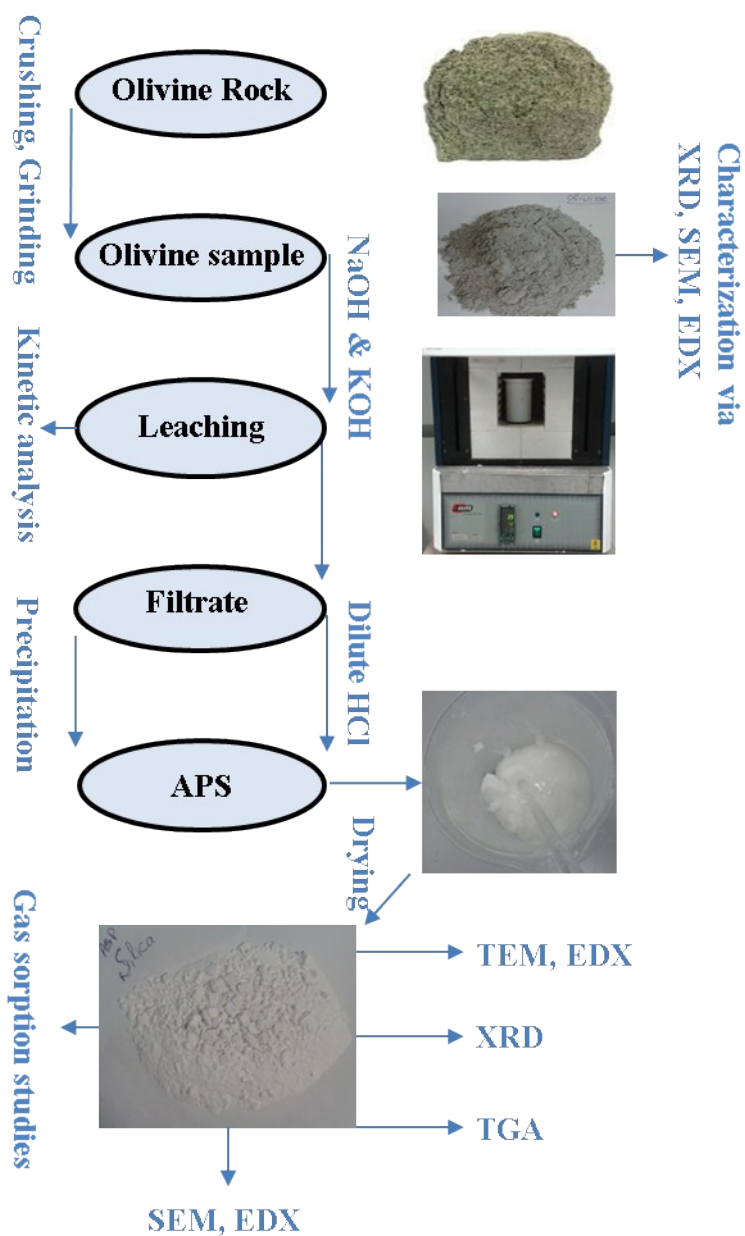

23

24

25 **Fig. S2** Schematic of APS synthesis from olivine using alkaline dissolution.

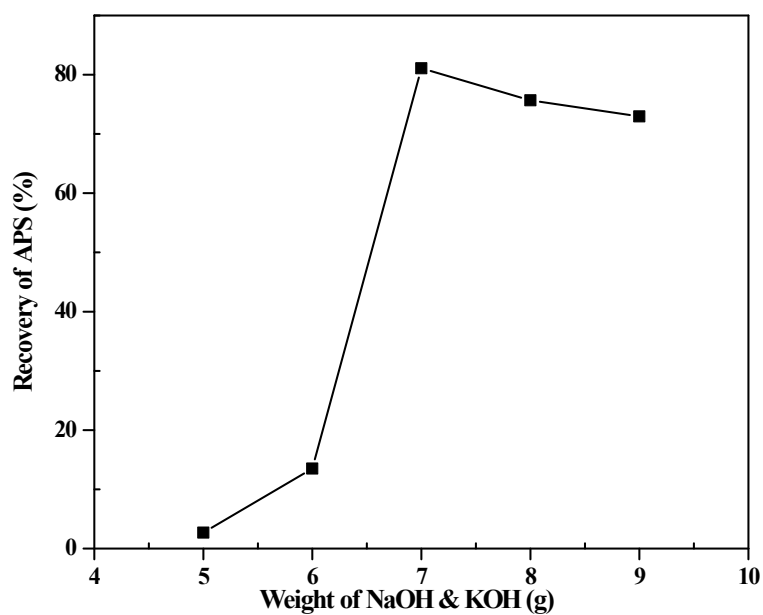

**Fig. S3** Effect of concentration of NaOH and KOH on the leaching of silica from olivine (Temperature 170°C, H<sub>2</sub>O content 0.8 mL, and reaction time 5 h for 10 g olivine).

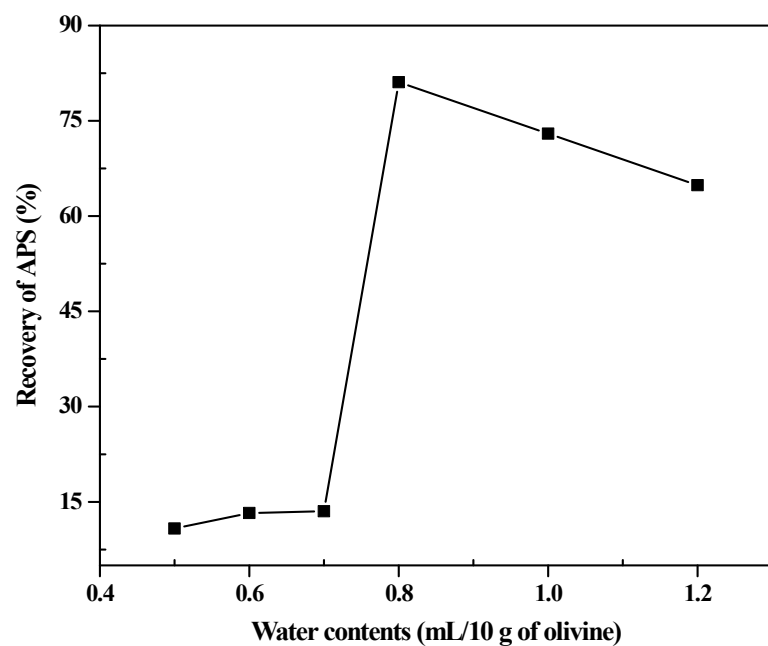

**Fig. S4** Effect of water content on the leaching of silica from olivine (Temperature 170 °C, mass of bases 14 g, reaction time 5 h for 10 g olivine).

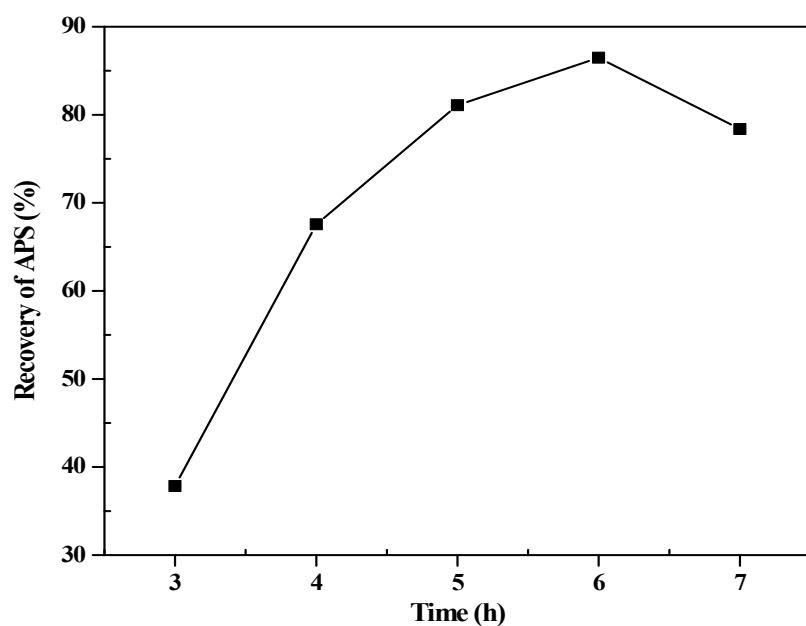

34

35

36 **Fig. S5** Effect of reaction time on leaching of APS from olivine (Temperature 170 °C, H<sub>2</sub>O  
 37 content 0.8 mL, mass of bases 14 g for 10 g olivine).

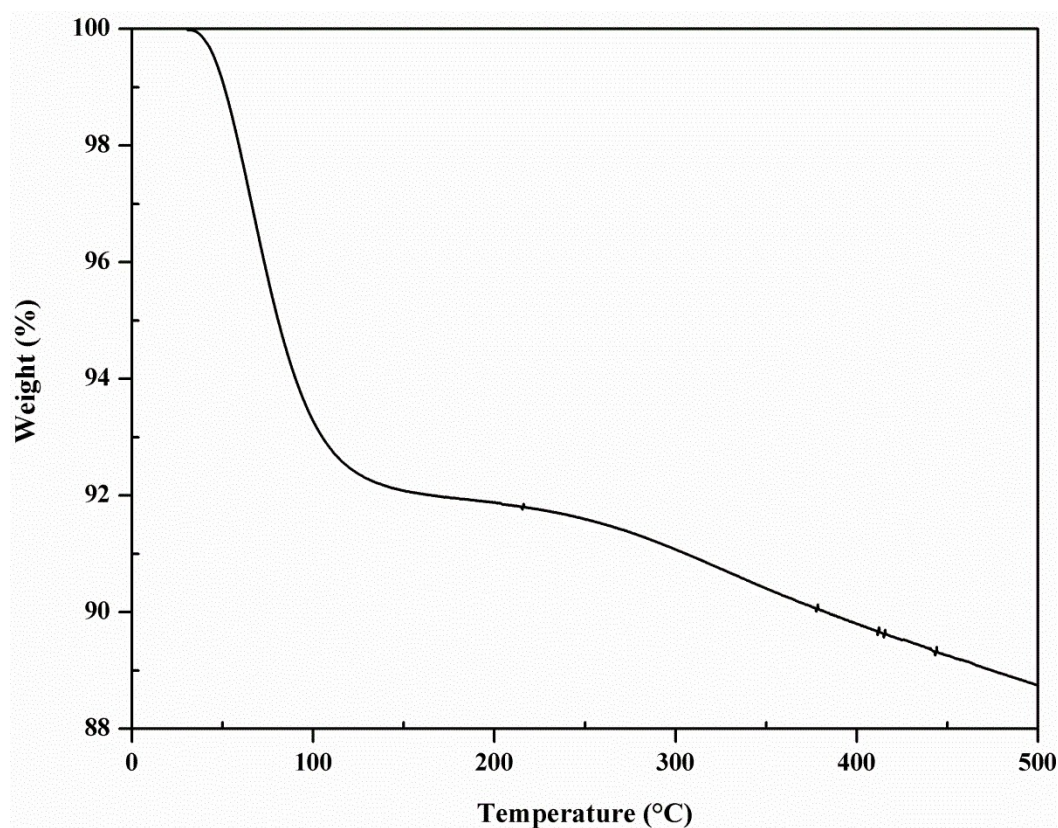

38

39

40 **Fig. S6** TGA curve of APS.

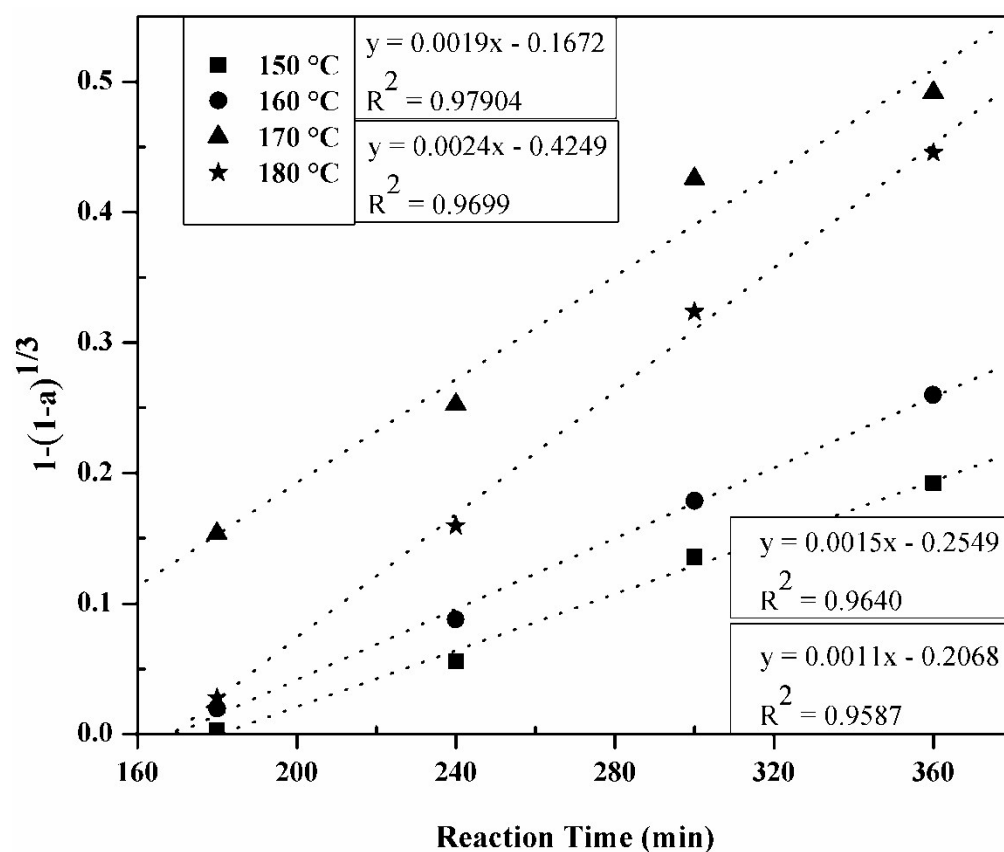

41

42

43 **Fig. S7A** plot of  $1 - (1 - \alpha)^{1/3}$  vs. reaction time.

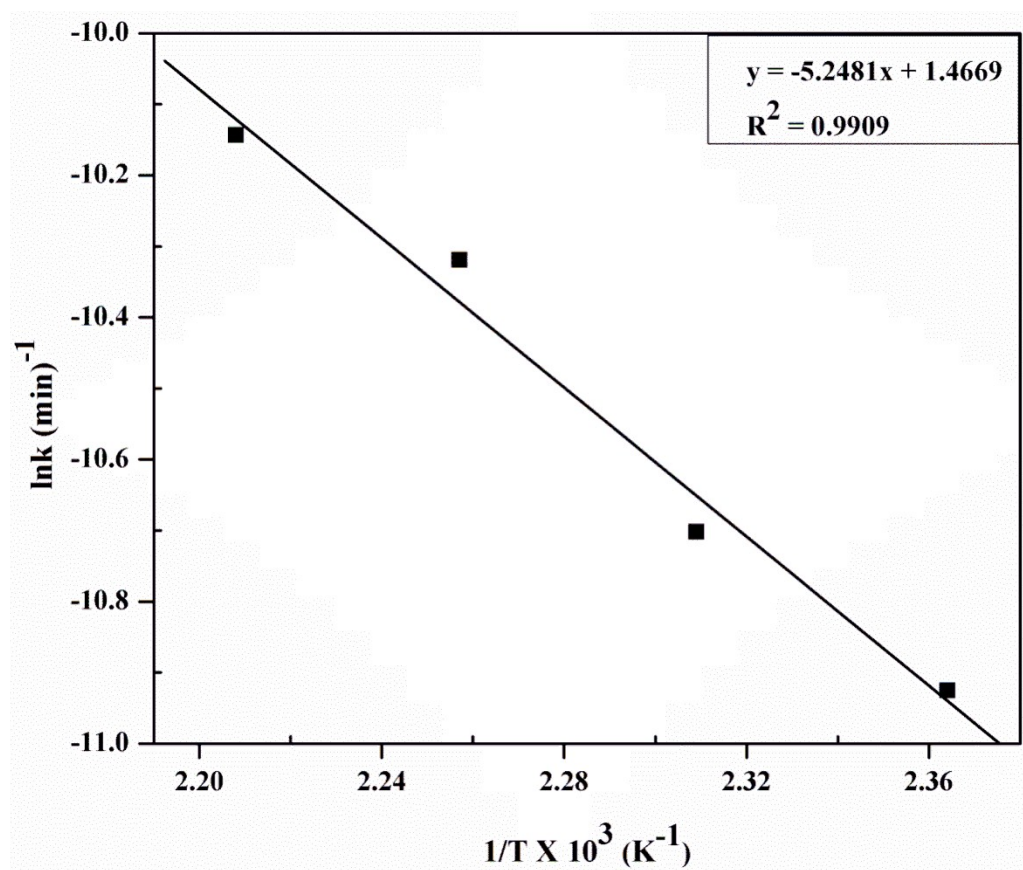

44

45 **Fig. S8** Arrhenius plot.
